# Supplementary material for: The root transcriptome for North American ginseng assembled and profiled across seasonal development
Source: PubMed Central journal article supplement (PMC3751939; doi:10.1186/1471-2164-14-564), 2013-08-19
Supplement: 1471-2164-14-564-S2.pdf [file 1471-2164-14-564-S2.pdf]

# FastQC plots of Stage I read quality scores

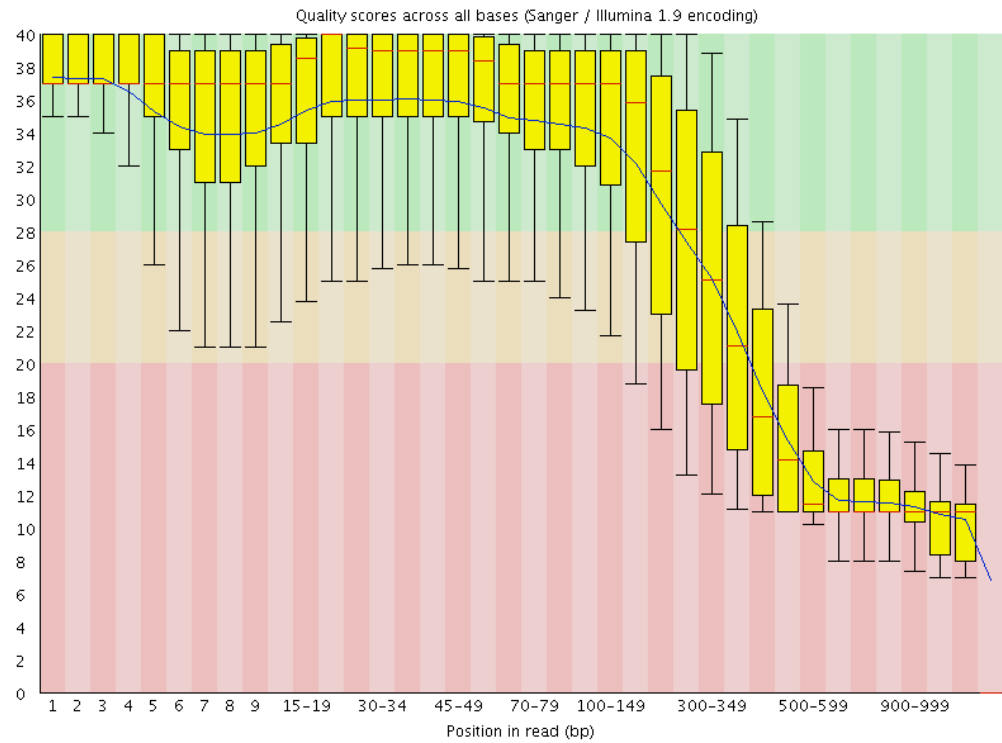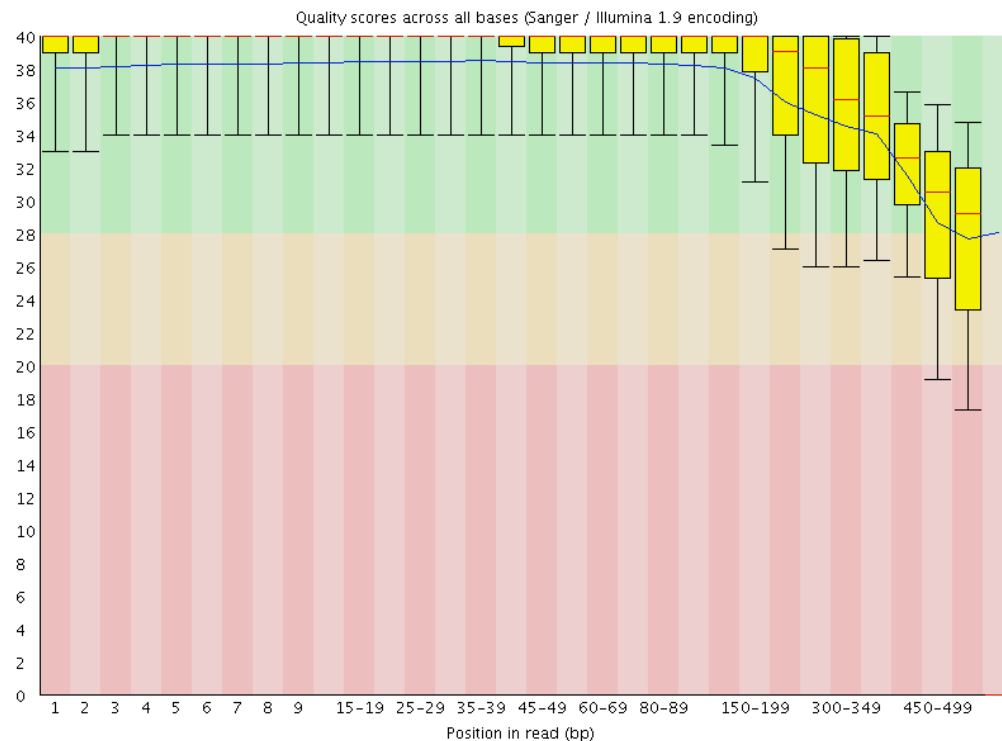

# FastQC plots of Stage 2 read quality scores

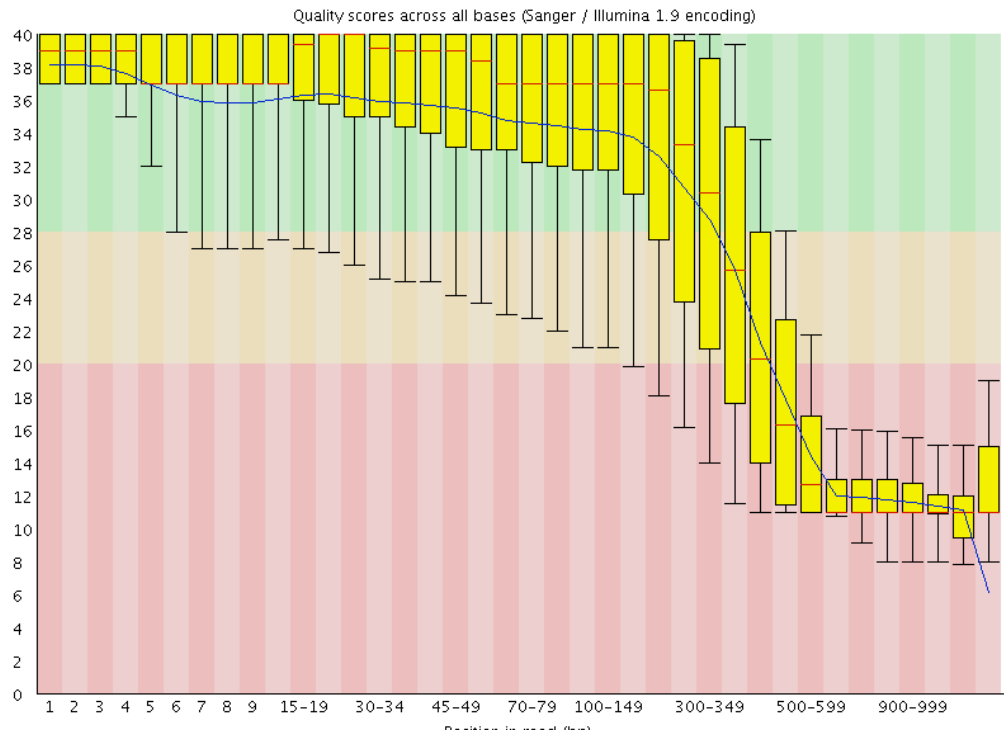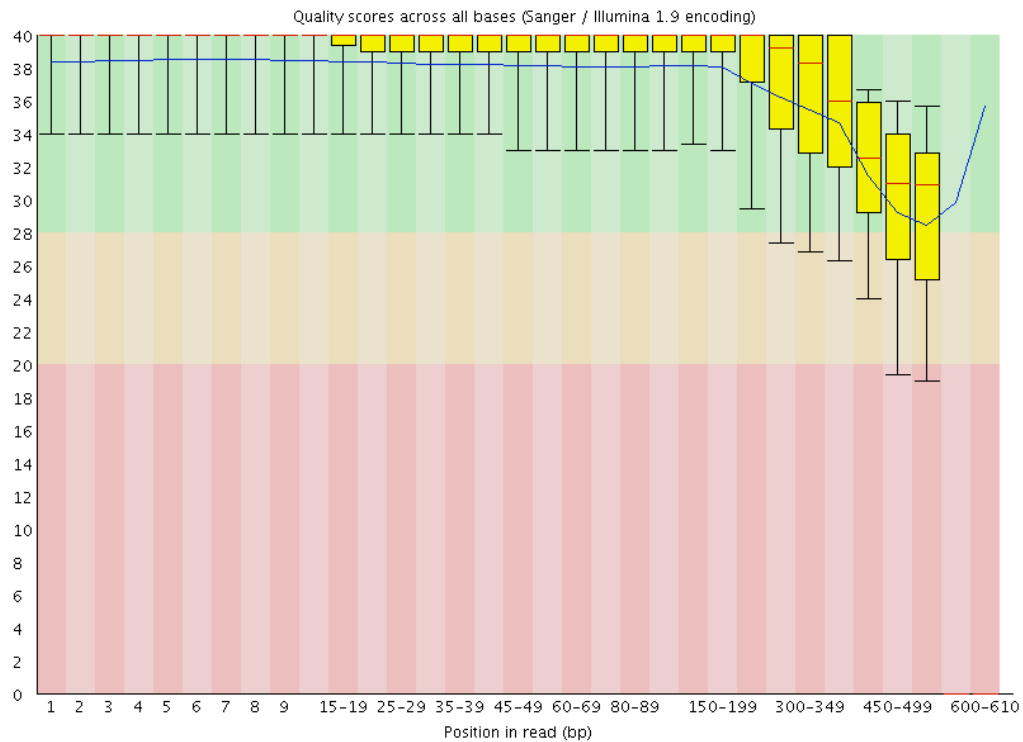

# FastQC plots of Stage 3 read quality scores

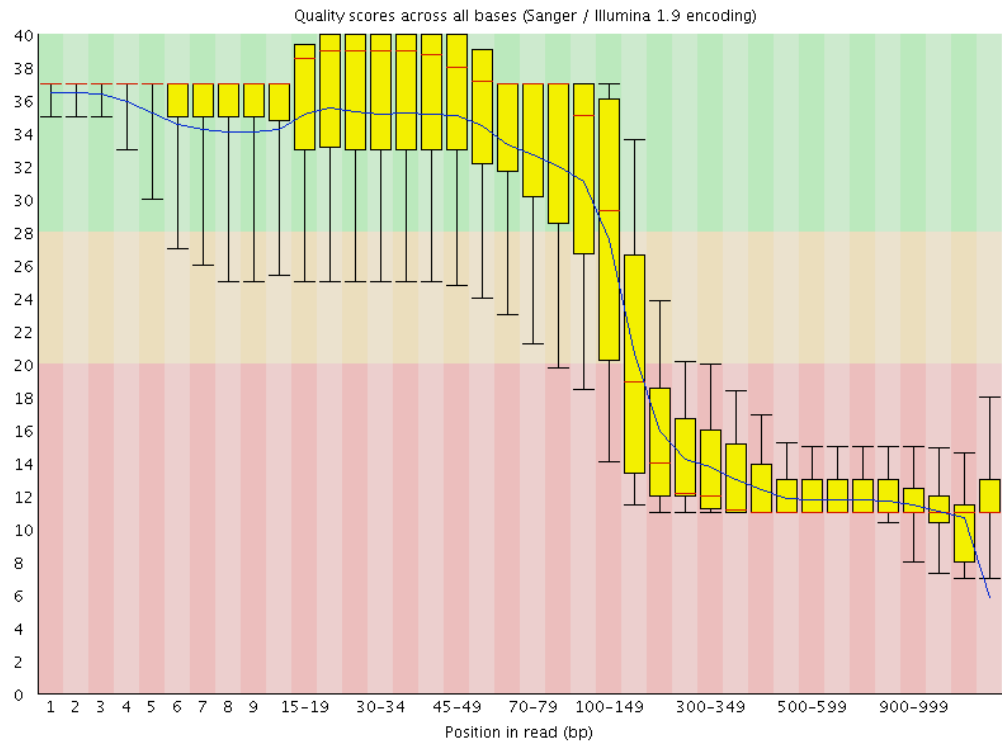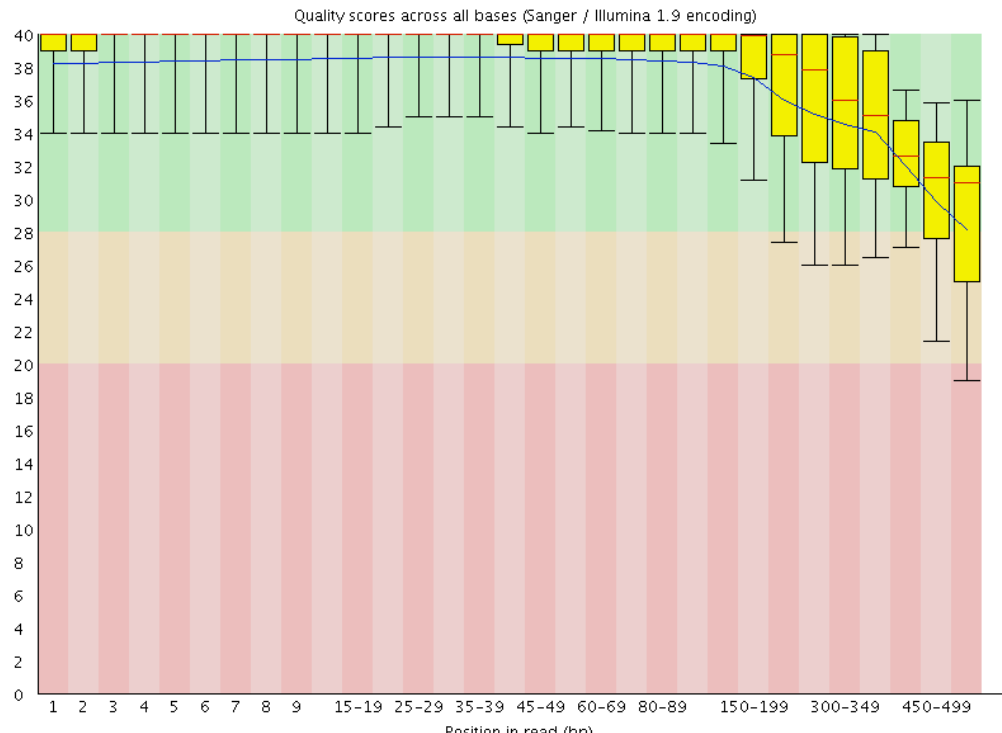

# FastQC plots of Stage 4 read quality scores

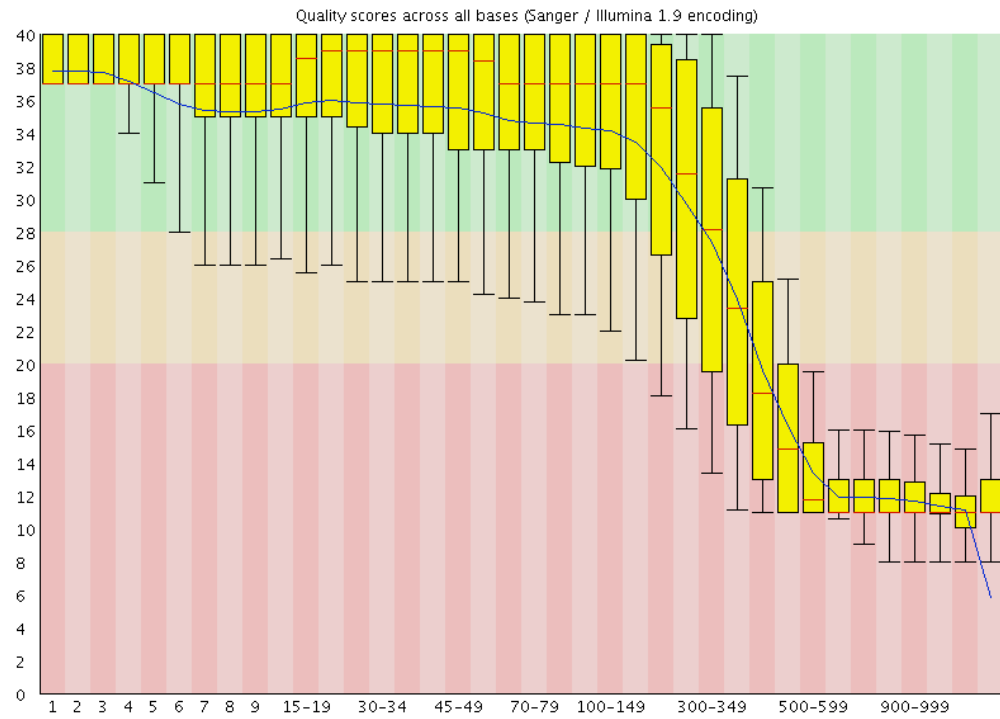

raw reads

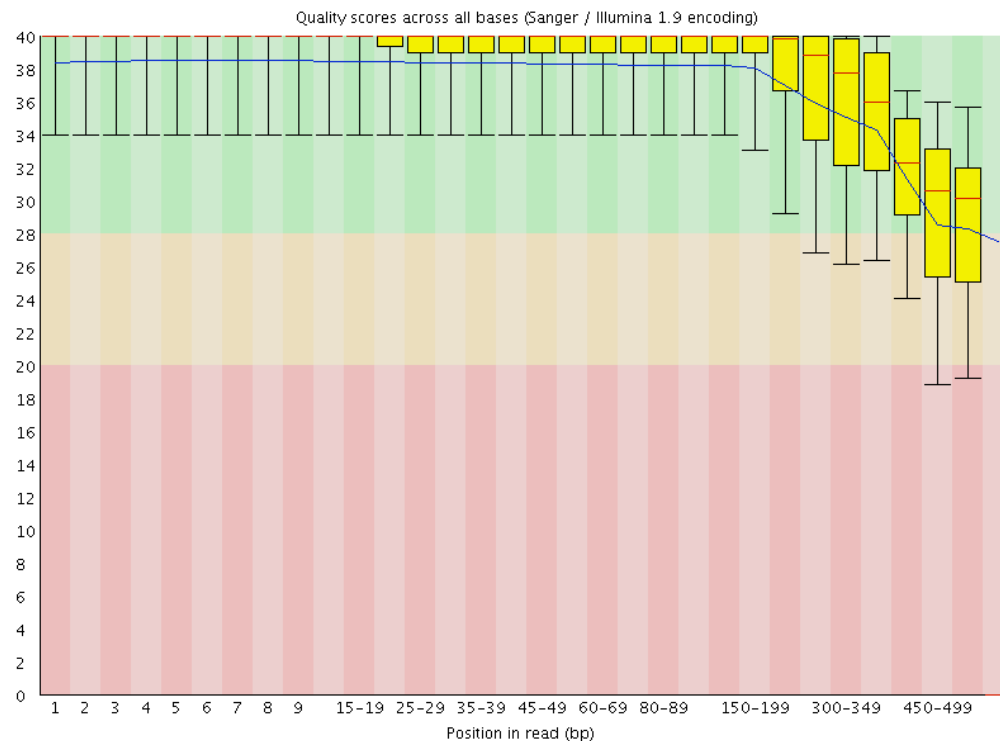

quality filtered reads

# FastQC plots of Stage 5 read quality scores

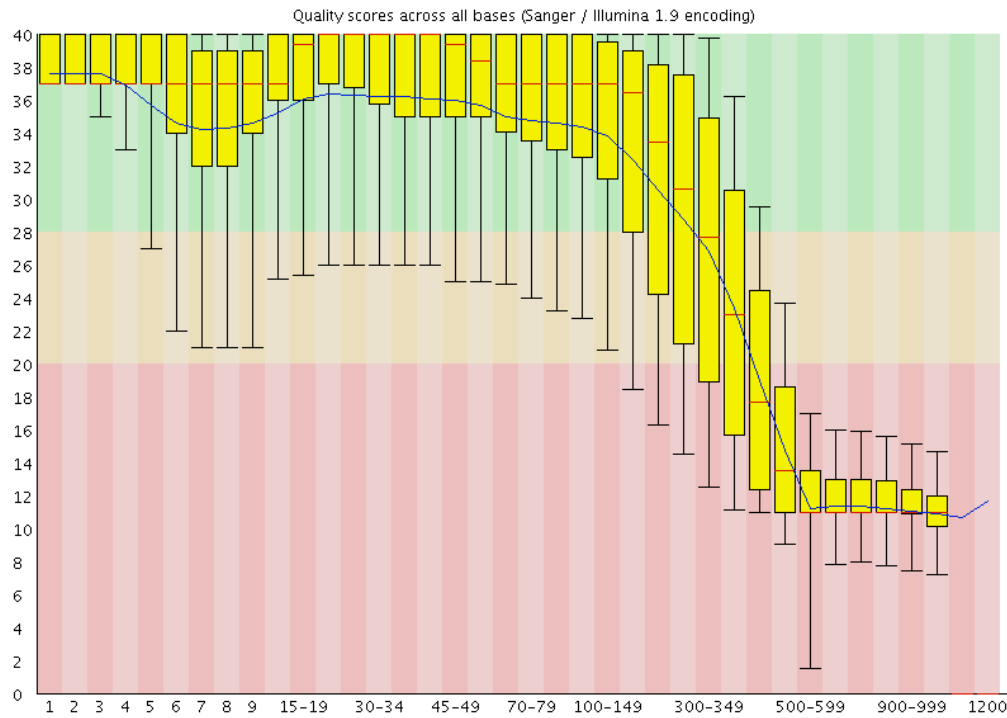

raw reads

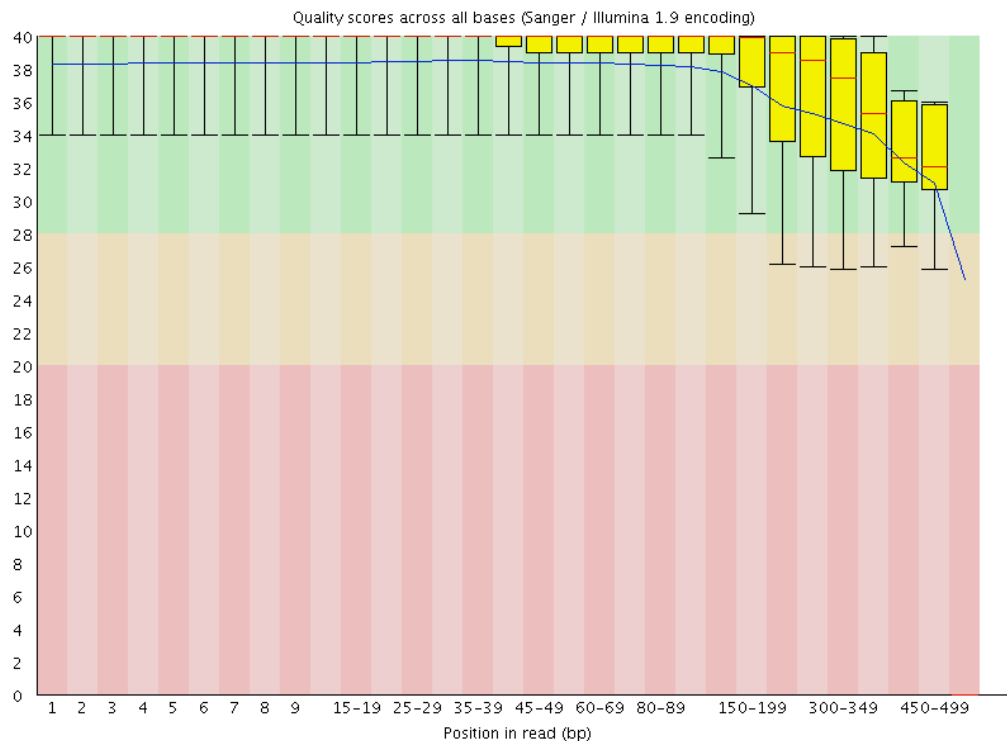

quality filtered reads

# FastQC plots of Stage 6 read quality scores

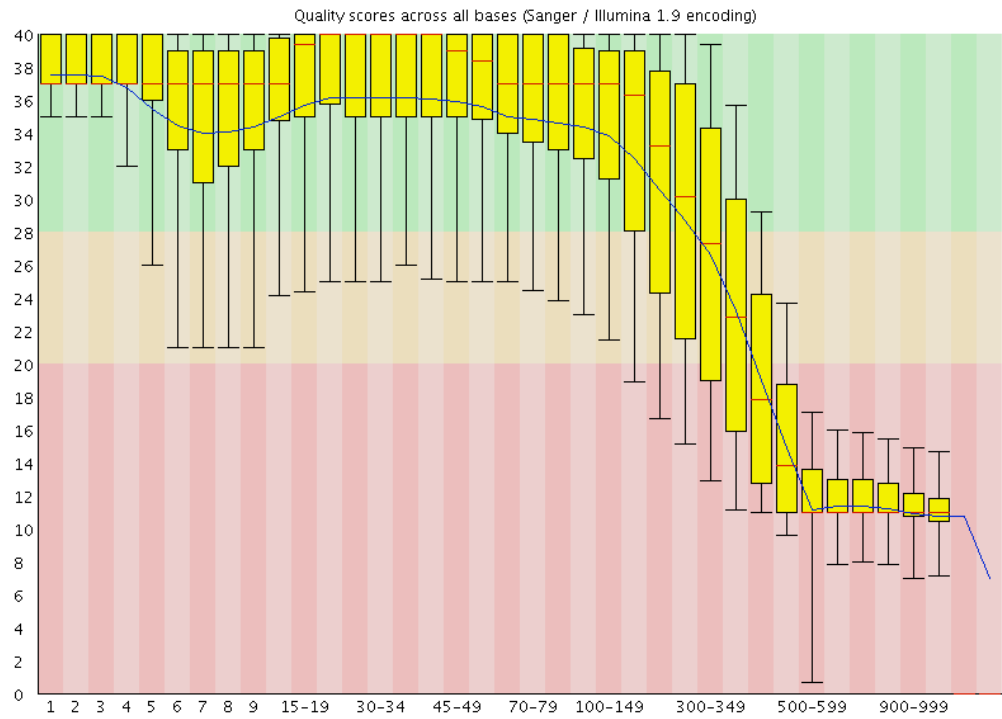

raw reads

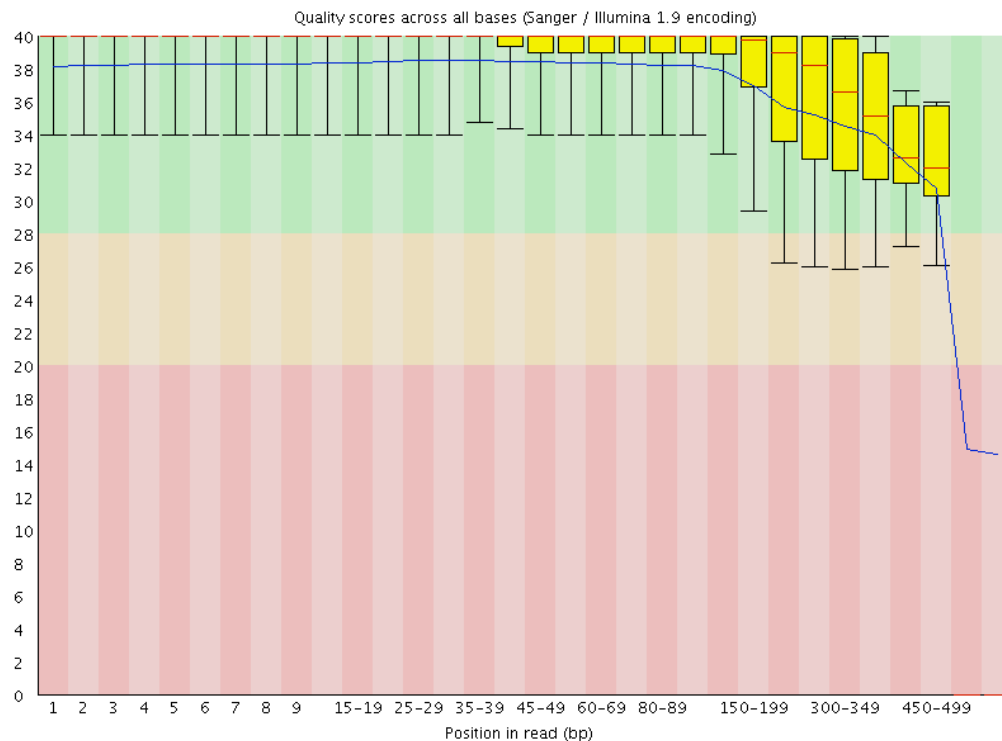

quality filtered reads

# FastQC plots of Stage 7 read quality scores

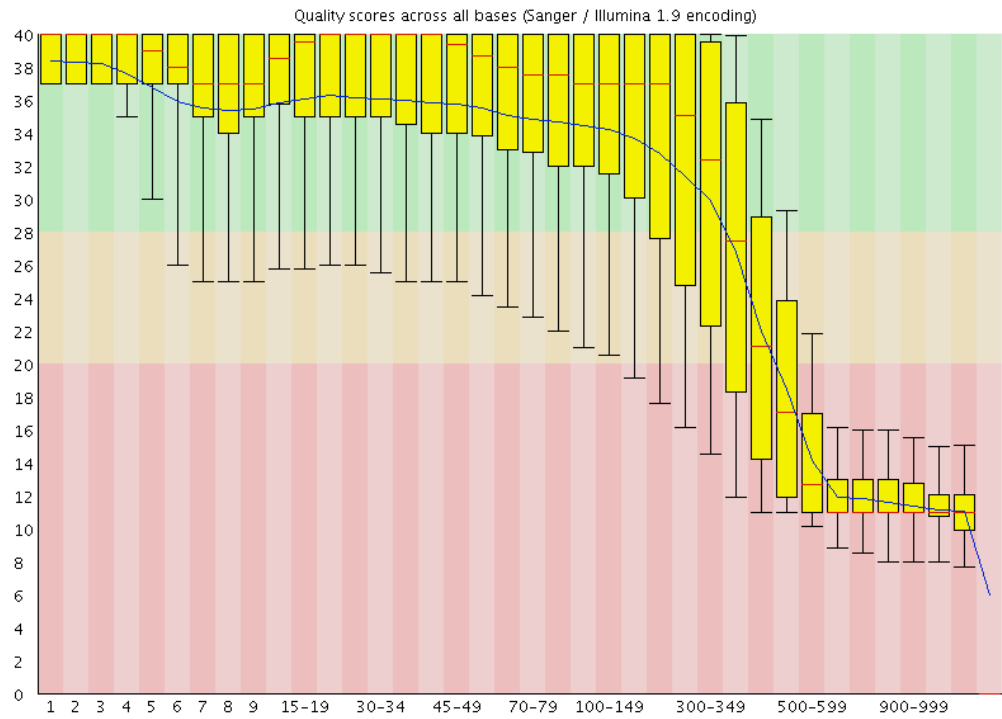

raw reads

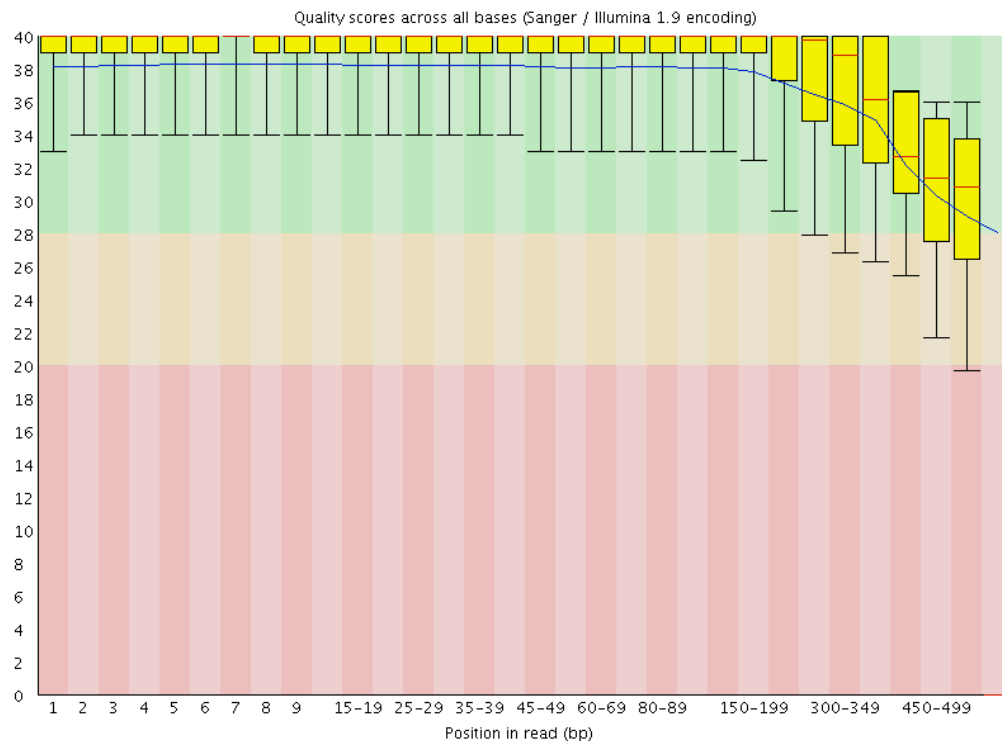

quality filtered reads
